# Supplementary material for: Kesterite Cu2Zn(Sn,Ge)(S,Se)4thin film with controlled Ge-doping for photovoltaic application
Source: Royal Society of Chemistry journal article supplement (doi:10.1039/c6nr00959j), 2016-01-01
Supplement: c6nr00959j1.pdf [file c6nr00959j1.pdf]

## Kesterite $\text{Cu}_2\text{Zn}(\text{Sn},\text{Ge})(\text{S},\text{Se})_4$ Thin Film with Controlled Ge-doping for Photovoltaic Application

Wangen Zhao <sup>a,b</sup>, Daocheng Pan <sup>b\*</sup>, Shengzhong (Frank) Liu <sup>a,c\*</sup>

a Key Laboratory for Applied Surface and Colloid Chemistry, National Ministry of Education; Shaanxi Engineering Lab for Advanced Energy Technology; School of Materials Science and Engineering, Shaanxi Normal University, Xi'an 710062, China.

b State Key Laboratory of Rare Earth Resource Utilization, Changchun Institute of Applied Chemistry, Chinese Academy of Sciences, 5625 Renmin Street, Changchun, Jilin, 130022, China

c Dalian Institute of Chemical Physics, Dalian National Laboratory for Clean Energy, Chinese Academy of Sciences, Dalian, 116023, China.

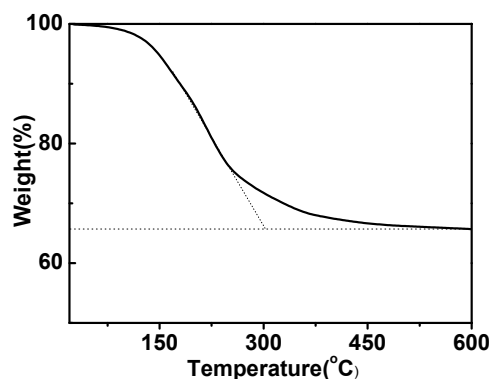

**Figure 1.** The TGA of CZTGSSe precursor.

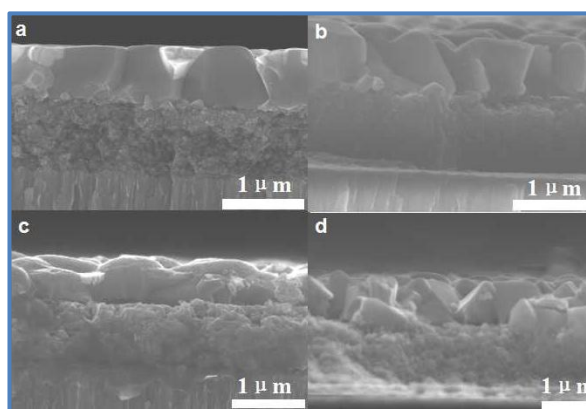

**Figure 2.** Cross-section images of CZTGSSe thin film coated on Mo substrate with different Ge contents (a) 20%, (b) 40%, (c) 60%, (d) 80%.

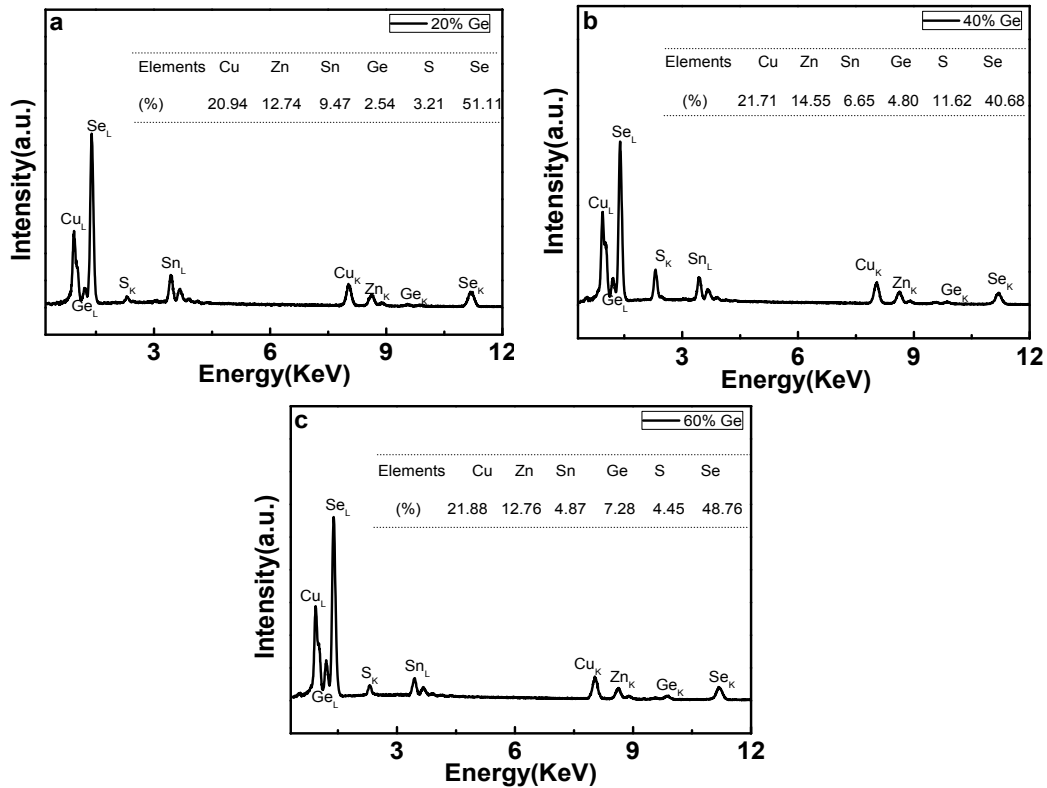

**Figure 3.** EDS spectra and chemical compositions of CZTGSSe thin film with different Ge addition (a) 20%, (b) 40%, (c) 60%.

Table 1. metal ratios based on different Ge doped CZTGSSe thin film

| Ratio | Cu/(Zn+Sn+Ge) | Zn/(Sn+Ge) | Ge/(Sn+Ge) |
|-------|---------------|------------|------------|
| 20%   | 0.85          | 1.06       | 0.21       |
| 40%   | 0.83          | 1.27       | 0.42       |
| 60%   | 0.88          | 1.05       | 0.60       |

In addition, the composition of the CZTGSSe thin film with 80% Ge doping was not given due to its poor coverage, resulting to uneven element distribution in large grain and small grain.

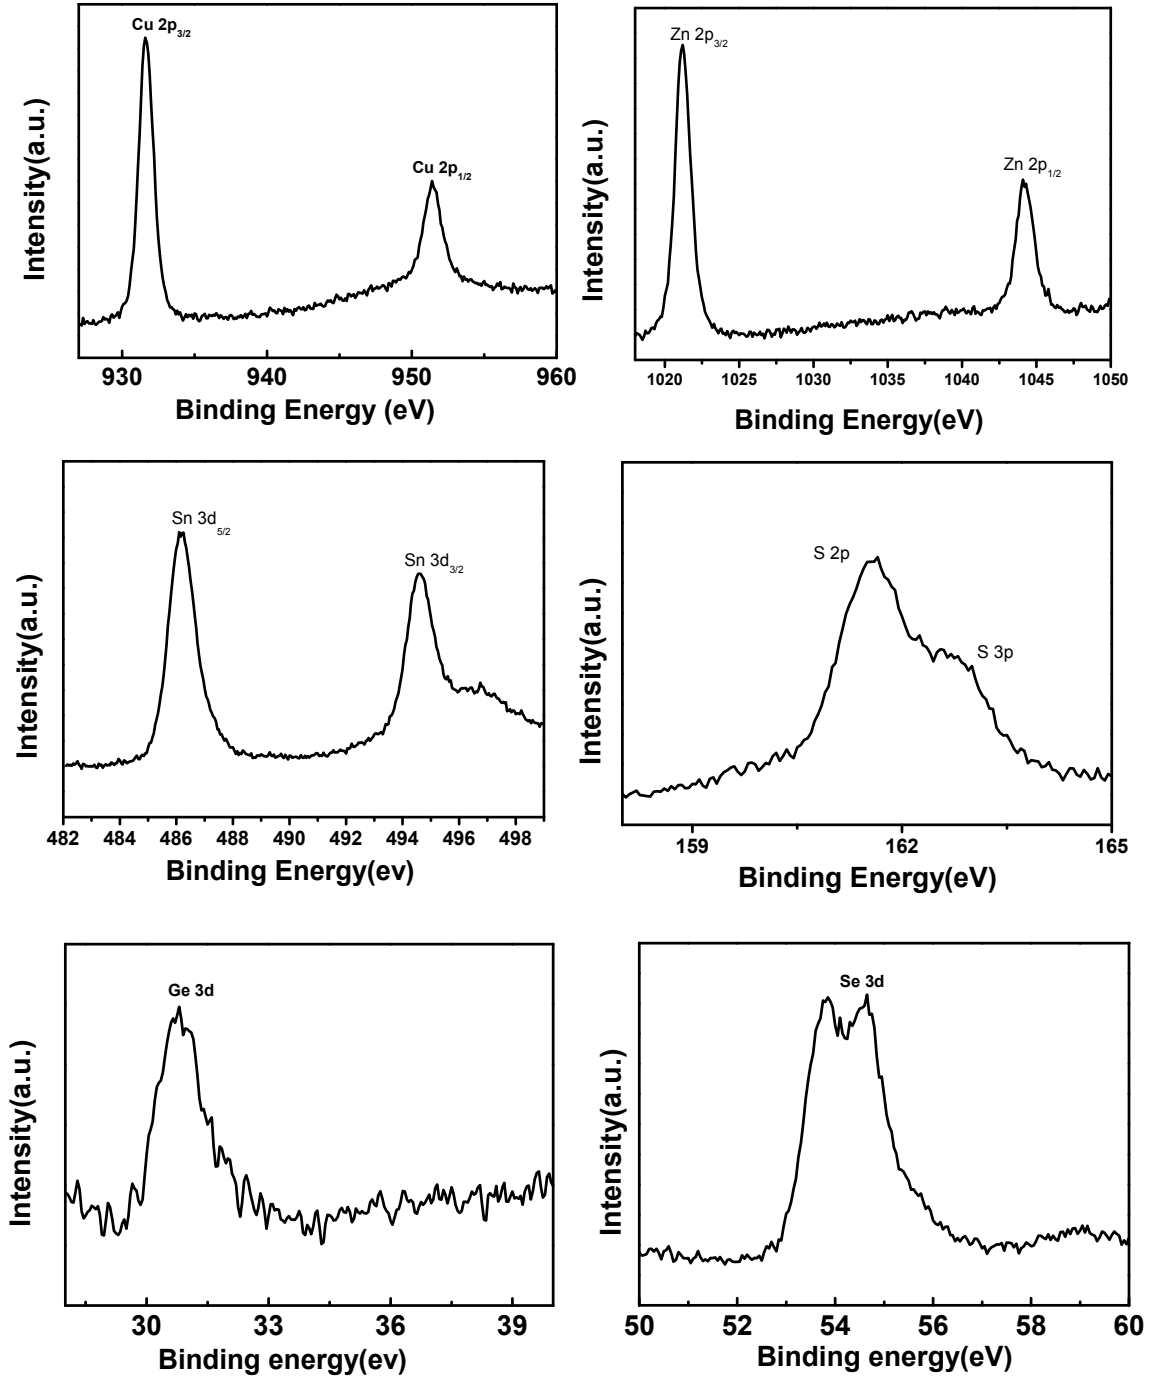

**Figure 4.** X-ray photoelectron spectroscopy (XPS) spectra of Cu, Zn, Sn, Ge, Zn, S, Se in the selenized CZTGSSe thin film.

Please note the XPS spectra of Se in the thin film, A obvious split peak appeared, which was corresponding to the element of selenium located in 55-56 eV. It may be due to the deposition of during the cooling process.

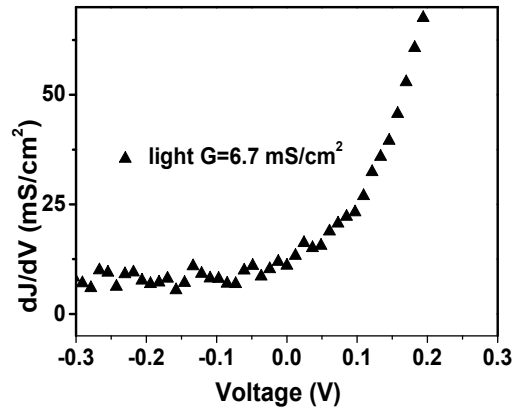

**Figure 5.** Light J-V curve was used to determine shunt resistance ( $R_{sh}$ ) of completed CZTGSSe thin film solar cell.
